# Supplementary material for: Prediction of topological phase transition in X2–SiGe monolayers
Source: Royal Society of Chemistry journal article supplement (doi:10.1039/c5cp06527e), 2016-01-01
Supplement: c5cp06527e1.pdf [file c5cp06527e1.pdf]

## Supporting information for

### Prediction of topological phase transition in X2-SiGe monolayers

Rosalba Juarez-Mosqueda<sup>1\*</sup>, Yandong Ma<sup>1\*</sup> and Thomas Heine<sup>1,2\*</sup>

<sup>1</sup>Department of Physics & Earth Sciences, Jacobs University Bremen, Campus Ring 1, 28759 Bremen, Germany

<sup>2</sup>Lehrstuhl für Theoretische Chemie, Wilhelm-Ostwald-Institut für Physikalische und Theoretische Chemie, Universität Leipzig, Germany

Corresponding author: [rjuarezmos@googlemail.com](mailto:rjuarezmos@googlemail.com) (R.J.M.), [myd1987@gmail.com](mailto:myd1987@gmail.com) (Y.M.), [thomas.heine@uni-leipzig.de](mailto:thomas.heine@uni-leipzig.de) (T.H.)

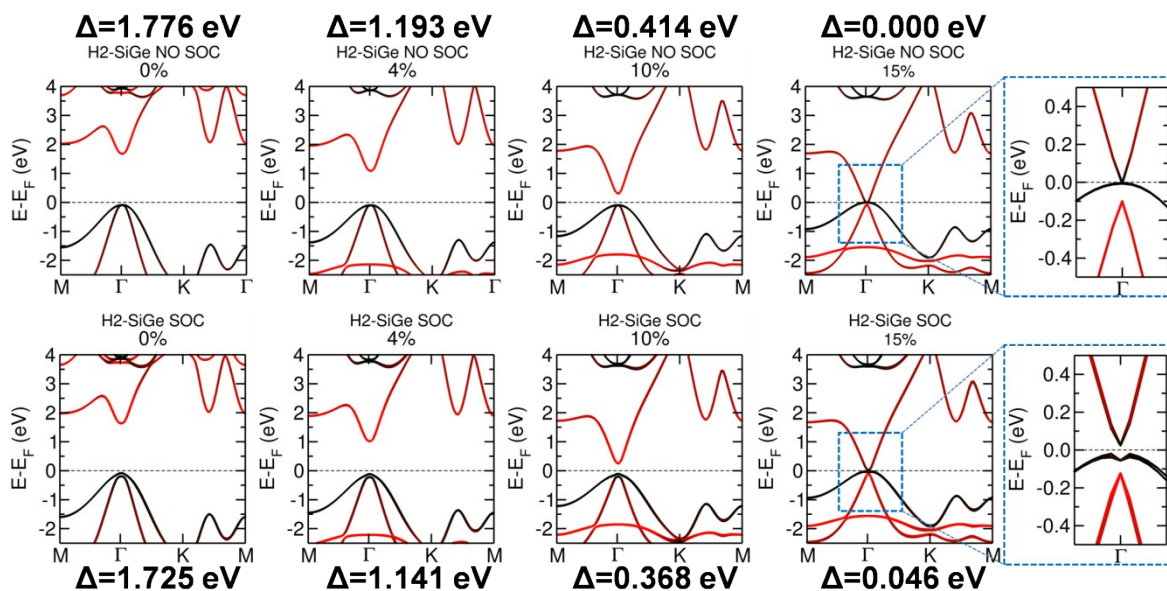

**Figure S1.** Evolution of the band structure of a H2-SiGe monolayer under strain. The band structures are calculated without (upper) and with (lower) SOC. The zoomed-in of the closest bands to the Fermi level for the 15%-strained H2-SiGe monolayer are shown right-most plots.  $\Delta$  stands for the band gap at each percentage of strain. The color gradient

indicates the contribution of the  $s$ ,  $p_x$ , and  $p_y$  orbitals to each of the bands along the k-path – red for  $s$ , and dark blue for  $p_x$ , and  $p_y$ .

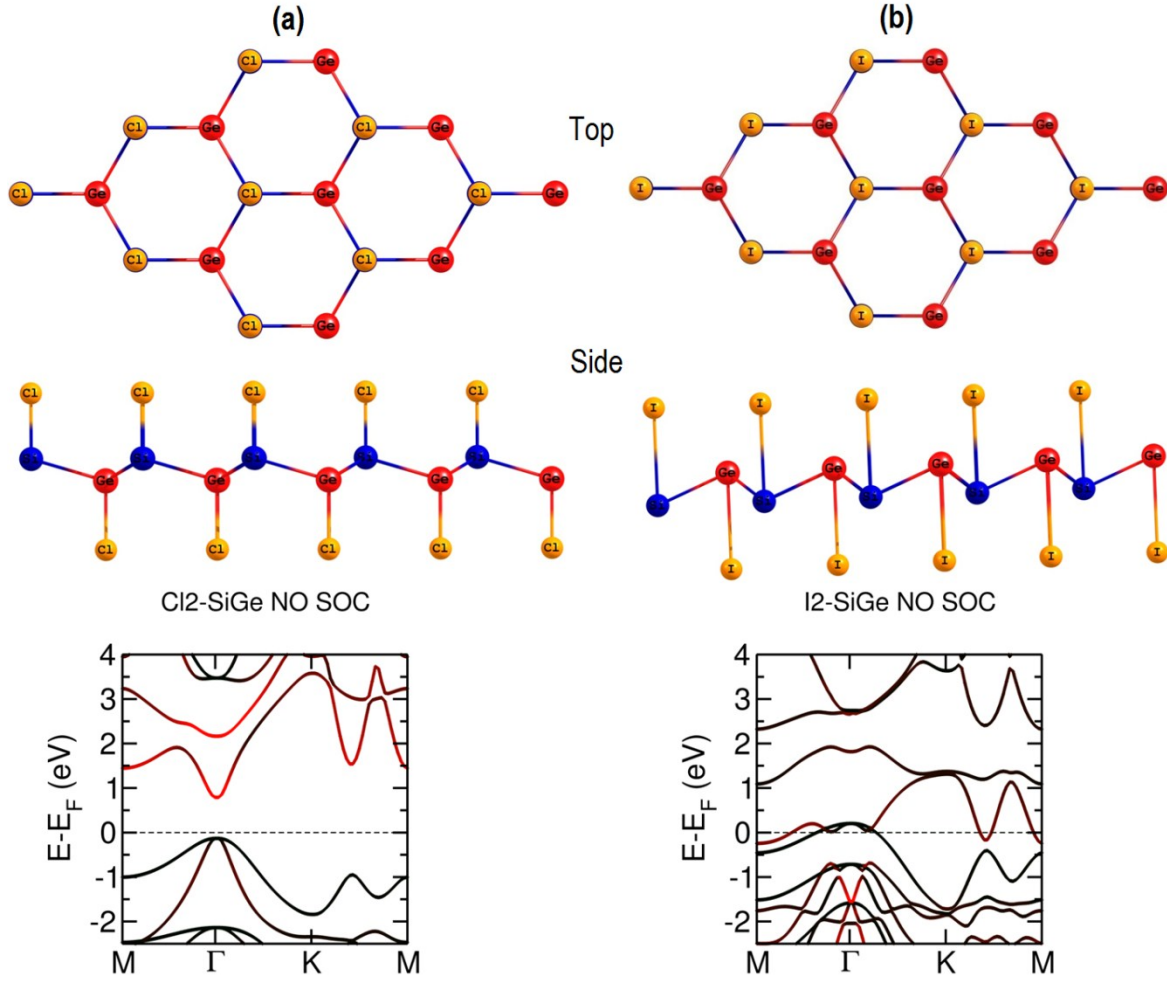

**Figure S2.** Top and side views of the optimized (a) Cl2-SiGe and (b) I2-SiGe structures with their corresponding band structure. The calculated bond distances for I2-SiGe are  $d_{\text{Si-I}} = 3.196 \text{ \AA}$ ,  $d_{\text{Ge-I}} = 3.160 \text{ \AA}$ ,  $d_{\text{Si-Ge}} = 2.522 \text{ \AA}$ , while for Cl2-SiGe are  $d_{\text{Si-Cl}} = 2.080 \text{ \AA}$ ,  $d_{\text{Ge-Cl}} = 2.188 \text{ \AA}$ ,  $d_{\text{Si-Ge}} = 2.451 \text{ \AA}$ . The color gradient in the plots indicates the contribution of the  $s$ ,  $p_x$ , and  $p_y$  orbitals to each of the bands along the k-path – red for  $s$ , and dark blue for  $p_x$ , and  $p_y$ .
